# Supplementary material
Source: Royal Society of Chemistry journal article supplement (doi:10.1039/d6cc02117d)
Supplement: d6cc02117d1.pdf [file d6cc02117d1.pdf]

Supplementary Information for:

**Labilized Ligands Under Ultra-Confinement: A Solid-State  $^2\text{H}$  NMR  
Investigation of  $\text{Ln}(\text{BH}_4)_2(\text{THF})_2/\text{HY}_{30}$**

Scott A. Southern,<sup>a</sup> Yuting Li,<sup>a</sup> Takeshi Kobayashi,<sup>a</sup> Long Qi,<sup>a,b</sup> Aaron D. Sadow,<sup>a,c</sup> Frédéric A. Perras<sup>a,c\*</sup>

<sup>a</sup> Chemical and Biological Sciences Division, Ames National Laboratory, Ames, IA 50011, United States

<sup>b</sup> Department of Chemical and Biological Engineering, Iowa State University, Ames, IA 50011, United States

<sup>c</sup> Department of Chemistry, Iowa State University, Ames, IA 50011, United States

\*fperras@ameslab.gov

## Table of Contents

|                                                                                    |    |
|------------------------------------------------------------------------------------|----|
| 1. Experimental Details .....                                                      | 3  |
| 1.1. Synthesis .....                                                               | 3  |
| 1.1.1. Sc(BH <sub>4</sub> ) <sub>3</sub> (THF) <sub>2</sub> .....                  | 3  |
| 1.1.2. Ln(BH <sub>4</sub> ) <sub>2</sub> (THF) <sub>2</sub> /Y <sub>30</sub> ..... | 3  |
| 1.2. Solid-State <sup>2</sup> H NMR Spectroscopy .....                             | 3  |
| 1.3. Density Functional Theory .....                                               | 3  |
| 1.3.1. Cluster Model Calculations .....                                            | 3  |
| 1.3.2. Plane Wave Calculations .....                                               | 4  |
| 2. Density Functional Theory .....                                                 | 4  |
| 2.1. THF Rotation .....                                                            | 4  |
| 2.2. THF Dissociation .....                                                        | 6  |
| 2.3. Intramolecular THF Exchange .....                                             | 6  |
| 3. Lineshape Simulations .....                                                     | 7  |
| 4. Supplementary Figures .....                                                     | 10 |
| 5. Geometry-Optimized Coordinates .....                                            | 11 |
| 5.1. Sc(BH <sub>4</sub> ) <sub>2</sub> (THF) <sub>2</sub> /Y <sub>30</sub> .....   | 11 |
| 5.2. Y(BH <sub>4</sub> ) <sub>2</sub> (THF) <sub>2</sub> /Y <sub>30</sub> .....    | 15 |
| 5.3. La(BH <sub>4</sub> ) <sub>2</sub> (THF) <sub>2</sub> /Y <sub>30</sub> .....   | 18 |
| 6. Supplementary References .....                                                  | 22 |

## 1. Experimental Details

### 1.1. Synthesis

#### 1.1.1. $\text{Sc}(\text{BH}_4)_3(\text{THF})_2$

$\text{Sc}(\text{BH}_4)_3(\text{THF})_2$  was synthesized using literature methods.<sup>1,2</sup> Briefly,  $\text{ScCl}_3$  (1.516 g, 10.01 mmol) and excess sodium borohydride (1.515 g, 40.05 mmol) were heated at reflux in dry THF (100 mL) for 5 days. The solution was filtered through a cannula wrapped with filter paper to remove the residual  $\text{NaBH}_4$  and  $\text{NaCl}$ . The filtrate was concentrated to saturated solution by evaporating under reduced pressure and then cooled at  $-30\text{ }^\circ\text{C}$  for 2 days, providing 1.905 g (81% yield)  $\text{Sc}(\text{BH}_4)_3(\text{THF})_3$ . The colorless powders were stored at  $-30\text{ }^\circ\text{C}$  freezer in a  $\text{N}_2$  glovebox.  $\text{Y}(\text{BH}_4)_3(\text{THF})_3$  and  $\text{La}(\text{BH}_4)_3(\text{THF})_3$  complexes were prepared via the same protocol. To deuterate the compound, 0.100 g of  $\text{Sc}(\text{BH}_4)_3(\text{THF})_2$  was stirred with 0.2 mL  $\text{THF-}d_8$  at room temperature for 30 h and then was evacuated under vacuum ( $10^{-3}$  mbar) for 12 h.

#### 1.1.2. $\text{Ln}(\text{BH}_4)_2(\text{THF})_2/\text{Y}_{30}$

0.020 g of  $\text{Sc}(\text{BH}_4)_3(\text{THF})_3$  (0.075 mmol) was dissolved in toluene (10 mL) and added to 0.300 g of zeolite  $\text{HY}_{30}$  that had been capped by  $\text{Ph}_3\text{SiCl}$  (namely  $\text{Ph}_3\text{Si-HY}_{30}$ ).<sup>2,3</sup> The mixtures were stirred at room temperature for 20 h. The supernatant was decanted and the solids were washed with toluene ( $3 \times 10$  mL). The obtained solids were then dried under vacuum ( $10^{-3}$  mbar) at room temperature for 24 h, giving  $\text{Sc}(\text{BH}_4)_2(\text{THF})_2/\text{Y}_{30}$ . The material was subsequently deuterated by taking 0.100 g  $\text{Sc}(\text{BH}_4)_2(\text{THF})_2/\text{Y}_{30}$  and stirring it with 0.2 mL  $\text{THF-}d_8$  at room temperature for 30 h. The material was then evacuated under vacuum ( $10^{-3}$  mbar) for 12 h. The procedure was repeated to prepare the Y and La analogues. Metal loadings were measured using inductively-coupled plasma optical emission spectroscopy (ICP-OES) and equaled 0.16, 0.069, and 0.076 mmol/g for Sc, Y, and La, respectively.

### 1.2. Solid-State $^2\text{H}$ NMR Spectroscopy

All solid-state NMR experiments were performed using an Agilent DD2 400 MHz NMR spectrometer equipped with a Chemagnetics 5 mm magic-angle spinning (MAS) probe operated as a static probe. Samples were flame-sealed into 5 mm NMR tubes to prevent their degradation and inserted directly into the coil of the probe. Samples were cooled using a nitrogen heat exchanger in a temperature range of 20 to  $-120\text{ }^\circ\text{C}$ . The  $^2\text{H}$  NMR spectra were acquired using a quadrupolar echo sequence with 2  $\mu\text{s}$  excitation and refocusing pulses and a 30  $\mu\text{s}$  delay. The number of scans was varied for each sample and temperature to obtain a reasonable signal-to-noise ratio and varied between 1024 and 10240 scans. The recycle delay was set to 2 s.

### 1.3. Density Functional Theory

#### 1.3.1. Cluster Model Calculations

Density functional theory (DFT) calculations were performed on a large cluster model of the micropore in zeolite Y consisting of 37 interconnected silicon tetrahedral sites that were

hydride-terminated. The desired  $\text{Ln}(\text{BH}_4)_2(\text{THF})_2$  was coordinated to an oxide site bonded to an aluminum tetrahedral site, to mirror the experimental chemical environment as closely as possible. Geometry optimizations froze the positions of the silicon atoms to those from the crystal structure to prevent the pore from relaxing in response to the grafted complex, which could influence the computed steric effects. The geometry-optimized structure for the La analogue is depicted in **Figure S1** and the coordinates are also given for the three supported complexes below. Calculations were all performed at the PBE-D3/TZP<sup>4,5</sup> level of theory using the Amsterdam Density Functional (ADF) program.<sup>6</sup>

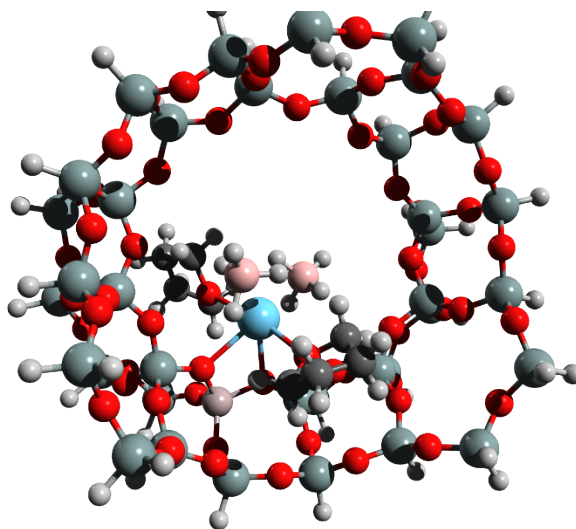

**Figure S1.** Geometry-optimized structure of  $\text{La}(\text{BH}_4)_2(\text{THF})_2/\text{Y}_{30}$ .

### *1.3.2. Plane Wave Calculations*

The activation energy barrier for intramolecular THF exchange was investigated using the nudged elastic band (NEB) method<sup>7,8</sup> as implemented in the *neb.x* module of the Quantum ESPRESSO (v7.1).<sup>9,10</sup> Calculations used the PBE exchange-correlation functional.<sup>4</sup>

Pseudopotentials were taken from the SSSP library.<sup>11</sup> Kinetic energy cutoffs for wavefunctions and charge density were set to 544 eV and 2177 eV, respectively. Brillouin zone integration was performed using Gamma-point sampling due to the large size of the simulation cell. To determine the energy barrier, the climbing-image NEB (CI-NEB) scheme<sup>9,10</sup> was used with 11 images to identify the saddle point. Calculations were considered converged when the forces on the climbing image fell below 0.05 eV/Å.

## **2. Density Functional Theory**

### **2.1. THF Rotation**

We performed potential energy surface scans as a function of the O-Ln-O-C dihedral angle in a Ln-bonded THF to rotate the ligand around its metal-oxygen bond. The scan was performed

in 10° increments and yielded rotation barriers of 17.4, 17.5, and 20.6 kJ/mol for the La, Y, and Sc complexes, respectively. The full list of relative energies are listed below in **Table S1**.

**Table S1.** Relative bonding energy as a function of THF rotation.

| $\varphi_{\text{O-Ln-O-C}} / ^\circ$ | Sc $\Delta E / \text{kJ mol}^{-1}$ | Y $\Delta E / \text{kJ mol}^{-1}$ | La $\Delta E / \text{kJ mol}^{-1}$ |
|--------------------------------------|------------------------------------|-----------------------------------|------------------------------------|
| 0                                    | 7.358016                           | 2.163648                          | 2.926199                           |
| 10                                   | 9.178669                           | 3.518879                          | 3.493018                           |
| 20                                   | 10.52416                           | 4.742126                          | 4.001288                           |
| 30                                   | 11.39735                           | 5.882406                          | 4.783766                           |
| 40                                   | 13.03558                           | 8.063173                          | 6.374793                           |
| 50                                   | 15.42216                           | 10.33693                          | 8.277545                           |
| 60                                   | 18.23869                           | 13.78096                          | 11.58764                           |
| 70                                   | 22.12795                           | 17.59972                          | 15.39079                           |
| 80                                   | 20.88793                           | 15.62939                          | 17.32951                           |
| 90                                   | 18.93954                           | 14.35673                          | 12.66518                           |
| 100                                  | 18.28894                           | 13.49179                          | 11.65638                           |
| 110                                  | 17.18983                           | 12.51395                          | 11.40864                           |
| 120                                  | 16.20217                           | 11.87319                          | 10.90417                           |
| 130                                  | 15.51203                           | 11.45443                          | 10.62133                           |
| 140                                  | 15.12086                           | 10.23895                          | 9.342868                           |
| 150                                  | 12.83021                           | 8.735616                          | 8.079215                           |
| 160                                  | 9.545189                           | 6.978500                          | 6.706525                           |
| 170                                  | 8.736955                           | 4.874241                          | 4.931135                           |
| 180                                  | 7.095729                           | 2.109432                          | 2.833807                           |
| 190                                  | 5.688671                           | 0.260712                          | 1.583728                           |
| 200                                  | 5.167010                           | 0.000000                          | 1.861086                           |
| 210                                  | 5.832286                           | 1.667508                          | 3.660131                           |
| 220                                  | 8.155538                           | 2.806371                          | 4.914831                           |
| 230                                  | 12.83835                           | 6.617284                          | 8.614055                           |
| 240                                  | 10.92686                           | 12.39139                          | 13.28603                           |
| 250                                  | 17.89549                           | 17.47121                          | 17.38837                           |
| 260                                  | 18.97982                           | 16.55504                          | 14.36889                           |
| 270                                  | 14.86133                           | 14.80315                          | 13.28692                           |
| 280                                  | 12.00751                           | 12.78800                          | 12.31753                           |
| 290                                  | 10.70296                           | 11.56031                          | 11.27587                           |
| 300                                  | 10.46902                           | 10.47325                          | 10.51426                           |
| 310                                  | 8.401626                           | 7.415305                          | 5.155721                           |
| 320                                  | 5.804088                           | 3.769142                          | 1.267408                           |
| 330                                  | 2.408686                           | 0.830708                          | 0.000000                           |
| 340                                  | 0.159630                           | 0.135423                          | 0.414750                           |
| 350                                  | 0.000000                           | 0.482409                          | 1.346540                           |

## 2.2. THF Dissociation

To estimate the free energy change associated with THF dissociation, geometry optimizations were performed on both  $\text{Ln}(\text{BH}_4)_2(\text{THF})_2/\text{Y}_{30}$  and  $\text{Ln}(\text{BH}_4)_2(\text{THF})/\text{Y}_{30}$  ( $\text{Ln} = \text{Sc}, \text{Y},$  or  $\text{La}$ ). Given that all silicon atoms' positions needed to be frozen, we could not estimate the free energy of the solid species because vibrational framework contributions to entropy have been neglected, however, we did estimate the entropy contributions from the THF translational and rotational degrees of freedom for the released THF as these are likely important. The translational entropy contribution was calculated as 0.1621 kJ/mol K, and the rotational entropy contribution as 0.1043 kJ/mol K, using the ideal gas rigid-rotor approximation. The bonding energies are listed in **Table S2** for the six complexes. Dissociation enthalpies equal 118, 111, and 87 kJ/mol for the La, Y, and Sc analogues, respectively, which are reduced to 40.3, 32.6, and 8.7 kJ/mol at 20 °C when considering the new degrees of freedom of the free THF.

**Table S2.** Bonding energies of  $\text{Ln}(\text{BH}_4)_2(\text{THF})_2/\text{Y}_{30}$  and  $\text{Ln}(\text{BH}_4)_2(\text{THF})/\text{Y}_{30}$

| Model                                                  | $E / \text{kJ mol}^{-1}$ |
|--------------------------------------------------------|--------------------------|
| $\text{La}(\text{BH}_4)_2(\text{THF})_2/\text{Y}_{30}$ | -99845.35406             |
| $\text{Y}(\text{BH}_4)_2(\text{THF})_2/\text{Y}_{30}$  | -99785.62787             |
| $\text{Sc}(\text{BH}_4)_2(\text{THF})_2/\text{Y}_{30}$ | -99713.09967             |
| $\text{La}(\text{BH}_4)_2(\text{THF})/\text{Y}_{30}$   | -92802.43295             |
| $\text{Y}(\text{BH}_4)_2(\text{THF})/\text{Y}_{30}$    | -92750.38491             |
| $\text{Sc}(\text{BH}_4)_2(\text{THF})/\text{Y}_{30}$   | -92701.73143             |
| THF                                                    | -6924.567608             |

## 2.3. Intramolecular THF Exchange

The energy barrier for the intramolecular THF exchange in  $\text{La}(\text{BH}_4)_2(\text{THF})_2/\text{Y}_{30}$  was estimated using a minimum energy path (MEP) search via the climbing-image nudged elastic band (CI-NEB) method. The energy profile reaches its maximum when the two THF ligands pass each other in a sterically constrained configuration (**Figure S2**), resulting in a calculated energy barrier of approximately 150 kJ/mol. The conformational rearrangement requires the two  $\text{BH}_4$  ligands to move in synchronization with the THF ligands; however, this collective motion is severely hindered by steric repulsion with the zeolite walls, which significantly increases the overall energy of the transition state.

In configurations where steric hindrance becomes excessive, the system alleviates the energy strain through the dissociation of one THF ligand from the La center, which occurs well before the system reaches the highest energy intermediate. Along this part of the MEP, a pronounced elongation of one La–O is observed, reaching 3.0 Å, indicating that one of the THF ligand is already in a nearly dissociated state. While the current DFT-based MEP calculation focuses on electronic energy at 0 K, in a real-world scenario, the dissociation of a ligand provides a significant entropic gain. This additional entropic contribution lowers the free energy barrier for dissociation, making it even more favorable than the positional exchange. Consequently, it is

expected that the ligands will dissociate at an earlier stage than predicted by the static energy profile, effectively pre-empting the intramolecular THF exchange.

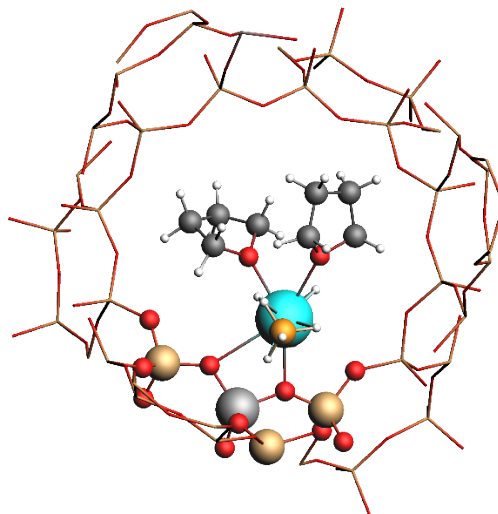

**Figure. S2** Highest energy geometry of  $\text{La}(\text{BH}_4)_2(\text{THF})_2/\text{Y}_{30}$  as it performs intramolecular THF exchange.

### 3. Lineshape Simulations

All lineshape simulations were performed using an open-source program developed in our lab that is available in the following repository.<sup>12</sup> They assumed a quadrupolar coupling constant of 163 kHz and no axial asymmetry, consistent with the expected  $C_Q$  for C-D bonds in a cyclic ether environment. Polar angles were calculated from a given structure using the approach described by Bryce.<sup>13</sup> Briefly, the polar angles for a given internuclear vector were calculated as:

$$\beta = \cos^{-1}\left(\frac{z}{\sqrt{x^2 + y^2 + z^2}}\right)$$

$$\gamma = \begin{cases} \cos^{-1}\left(\frac{x}{\sqrt{x^2 + y^2}}\right) & \text{if } y > 0 \\ 60^\circ - \cos^{-1}\left(\frac{x}{\sqrt{x^2 + y^2}}\right) & \text{if } y \leq 0 \end{cases}$$

Calculations were performed using a 3-angle powder average comprising a 678-angle REPULSION grid<sup>14</sup> interleaved with a 15-step  $\gamma$  angle average. 256 time increments were considered with a spectral width of 400 kHz and 5 kHz of Lorentzian broadening. The full set of polar angles describing a single molecule are listed in **Table S3**. Additional tetrahedral averaging was performed to emulate the isotropic motion seen in the grafted species.

**Table S3.** Polar angles describing the rotation-related C-H bonds in  $\text{Ln}(\text{BH}_4)_2(\text{THF})_2/\text{Y}_{30}$

| Site <sup>a</sup> | $\beta / ^\circ$ | $\gamma / ^\circ$ |
|-------------------|------------------|-------------------|
|-------------------|------------------|-------------------|

|                             |     |     |
|-----------------------------|-----|-----|
| <b><math>\alpha</math>1</b> | 94  | 101 |
| <b><math>\alpha</math>1</b> | 141 | 287 |
| <b><math>\alpha</math>2</b> | 26  | 289 |
| <b><math>\alpha</math>2</b> | 150 | 264 |
| <b><math>\beta</math>1</b>  | 61  | 135 |
| <b><math>\beta</math>1</b>  | 84  | 252 |
| <b><math>\beta</math>2</b>  | 43  | 99  |
| <b><math>\beta</math>2</b>  | 134 | 336 |

<sup>a</sup> $\alpha$  and  $\beta$  refer to the respective positions of the two chemically distinct deuterons on THF. The numbers refer to ligands 1 and 2 on either side of the molecule.

Exchange rates were calculated on-the-fly for a given temperature and energy barrier using the Eyring relationship below.  $T$  refers to the temperature,  $k_B$  to the Boltzmann constant,  $h$  to the Planck constant, and  $\Delta G^\ddagger$  to the free energy barrier.

$$k_{ex} = \frac{k_B T}{h} \exp\left(\frac{-\Delta G^\ddagger}{RT}\right)$$

Component-based fits were also performed for the  $\text{Sc}(\text{BH}_4)_3(\text{THF})_3$  complex using the fast-motion limit lineshapes associated to libration, intramolecular exchange, and a combination of intramolecular exchange and THF rotation. THF libration was approximated with a lineshape having an averaged  $C_Q$  of 145 kHz and a 0.14 asymmetry parameter, which corresponds to a discrete case with a 30° libration angle. As the temperature was increased, the librating component was observed to narrow, suggesting an increase in librational amplitude. This was accounted for using a temperature-dependent order parameter ( $\langle S \rangle$ ). The temperature dependent weights are listed in **Table S4** and are plotted in **Figure S3**.

**Table S4.** Weights used in the fit shown in Figure 3 for  $\text{Sc}(\text{BH}_4)_3(\text{THF})_2$

| $T / \text{K}$ | static | librating | exchange | exchange and rotation | $\langle S \rangle_{\text{libration}}$ |
|----------------|--------|-----------|----------|-----------------------|----------------------------------------|
| -120           | 56     | 39        | 6        | 0                     | 1.00                                   |
| -100           | 33     | 53        | 13       | 0                     | 1.00                                   |
| -90            | 15     | 62        | 23       | 0                     | 1.00                                   |
| -80            | 0      | 67        | 27       | 7                     | 1.00                                   |
| -70            | 0      | 61        | 30       | 7                     | 0.95                                   |
| -60            | 0      | 56        | 11       | 29                    | 0.90                                   |
| -50            | 0      | 52        | 0        | 45                    | 0.90                                   |
| -40            | 0      | 48        | 0        | 48                    | 0.88                                   |
| -30            | 0      | 44        | 0        | 52                    | 0.85                                   |
| -20            | 0      | 43        | 0        | 53                    | 0.83                                   |
| -10            | 0      | 36        | 0        | 60                    | 0.75                                   |
| 0              | 0      | 31        | 0        | 65                    | 0.72                                   |
| 10             | 0      | 18        | 0        | 82                    | 0.72                                   |

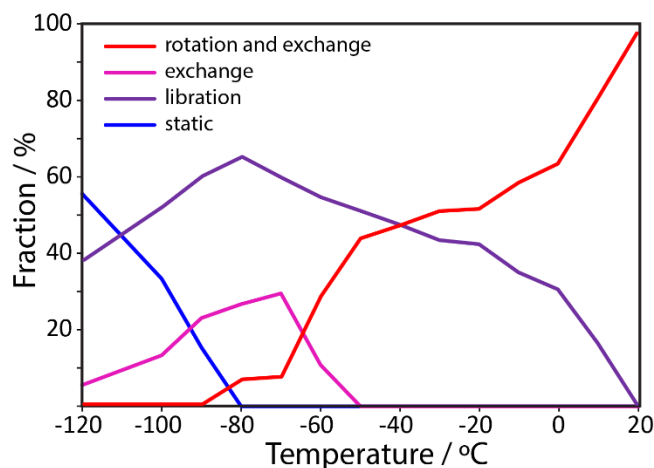

**Figure S3.** Temperature dependence of the weights used in the fit shown in Figure 3 for  $\text{Sc}(\text{BH}_4)_3(\text{THF})_2$ .

Simulations of the variable temperature NMR data for the  $\text{HY}_{30}$ -supported complexes undertook a time-domain approach as only this method can simulate the narrowing of the isotropic resonance from intermolecular exchange. Nevertheless, these simulations incorporate a component from a purely rotating THF group that is visible as a baseline feature in the spectra and thought to originate from silanol-grafted sites that are visible by  $^{11}\text{B}$  NMR.

## 4. Supplementary Figures

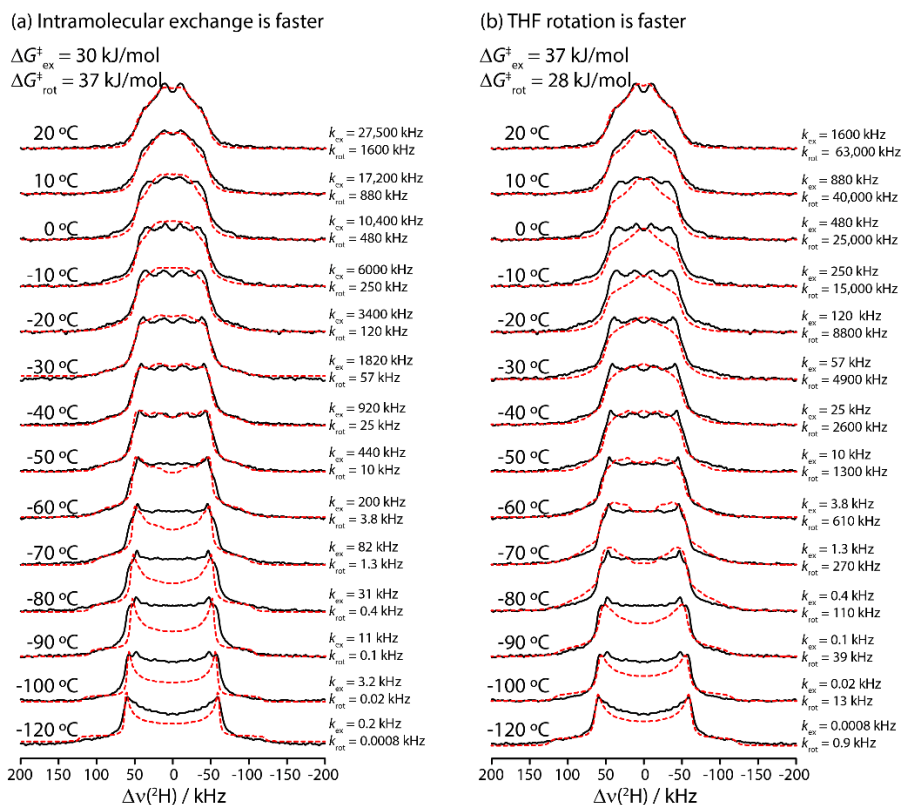

**Figure S4.** Variable temperature  $^2\text{H}$  NMR spectra of  $\text{Sc}(\text{BH}_4)_3(\text{THF})_2$  with time-domain simulations assuming constant  $\Delta G_{\ddagger}$  and that either (a) intramolecular exchange or (b) THF rotation is faster. The intermediate lineshapes have a cusp in the center and do not match the experimental result in (b) suggesting that THF rotation has the higher barrier.

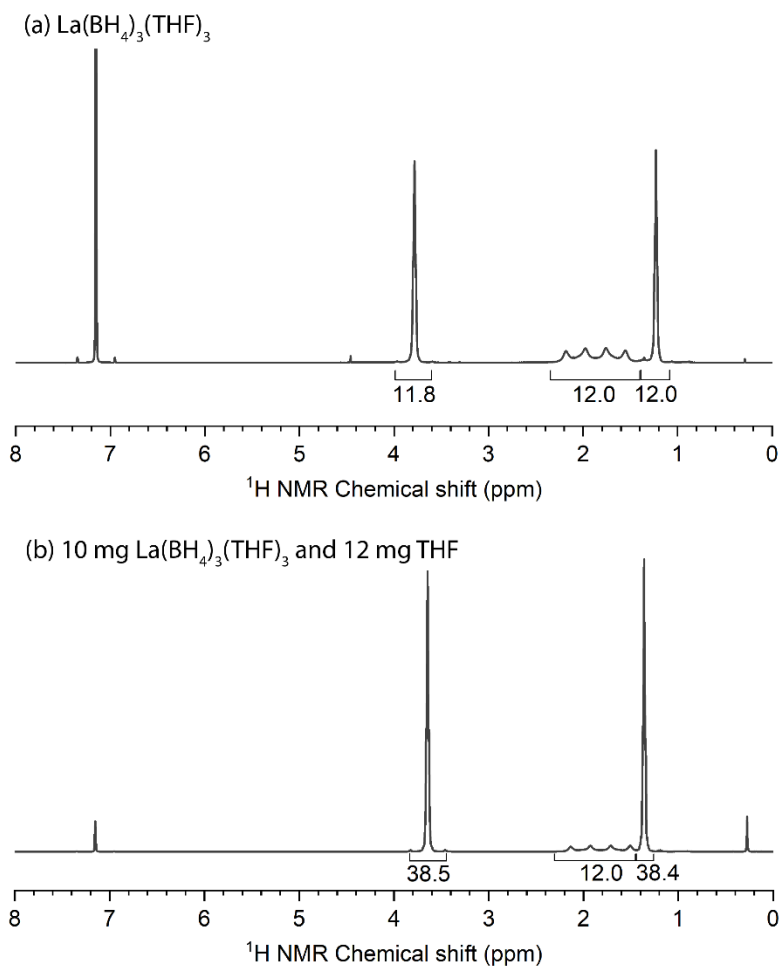

**Figure S5.** Liquid-state  $^1\text{H}$  NMR spectra acquired for  $\text{C}_6\text{D}_6$  solutions of  $\text{La}(\text{BH}_4)_3(\text{THF})_3$  acquired without (a) and with (b) the addition of excess THF. As is evident from the spectrum and integrals, the excess THF is in rapid chemical exchange with the La-bound THF.

## 5. Geometry-Optimized Coordinates

### 5.1. $\text{Sc}(\text{BH}_4)_2(\text{THF})_2/\text{Y}_{30}$

```

Sc 18.82325582801248 7.882464776531349 6.368538960153203
O 19.75020945829827 6.400044498581743 8.270558188712583
O 17.32500447640999 6.18331184580245 6.646229724860877
B 17.79948924507838 8.373394752749633 4.376676039017444
B 18.14587056465124 9.471422717708549 7.876485094275379
O 20.75205317999711 9.014652040565661 6.114441744959668
H 19.22816674017682 8.988733031264287 8.213834997127426
H 17.37764440658761 8.504086148507819 7.747424933790826
H 17.03463332175281 8.377037189322321 5.356016793320886
H 18.69844346972966 9.165701918422 4.679270979972886
H 18.28301164352391 9.900744249240342 6.722716443666361
C 15.49686960079504 4.796967902687604 5.956028079254798
Si 18.17039236111365 3.670904667623998 10.56821250977811

```

Si 16.08298507918421 5.274972788485146 12.19765473006501  
Si 21.30777063098081 8.177328528424047 2.224290360708302  
Si 19.83034330648602 10.47435528811806 0.8539809458493575  
Si 18.494187349613 9.881468233758914 13.80418263901107  
Si 13.41633800444066 11.68575293321304 9.949332174471733  
Si 14.91892180604226 9.393209929388473 11.33423157194002  
Si 22.74906296161497 6.601091327088554 10.62701218066163  
Si 21.04101121424635 5.941662577004375 4.271742937360798  
Si 17.5811833336759 7.926885367331652 11.53693984404205  
Si 19.68358898635822 6.35703219482746 9.906124239924727  
Si 24.08493298078833 6.188396541070476 5.008869029902728  
Si 18.87698065889061 2.488932934351078 7.897700099083481  
Si 23.52133086268682 5.462304697900136 7.926597821978866  
Al 20.44347263326601 5.148373005955044 7.202613617537454  
O 24.11914630745845 6.318403612109321 6.633877235839795  
O 17.84829506467298 2.995490174503729 9.115259617872933  
O 24.32847709066255 7.710074611067413 4.423878994377674  
O 22.18480083254721 8.932279747240715 13.62195833798876  
O 21.10987621900277 6.797960448511829 10.5789996237484  
O 22.82489551393375 8.752666144541113 2.420755052235075  
O 22.0955221355332 4.77611037574352 7.60963219613446  
O 22.64343802066474 5.605798312058214 4.437107541047047  
O 23.36631822273399 7.927094344134625 11.37967812091568  
O 16.73453192216632 4.303713013478919 11.0569795990562  
O 20.28517816830456 6.141766668606945 5.717432493161168  
O 20.80755453926336 7.374299108435398 3.531268719170574  
O 18.37980333177888 11.05875965529338 1.313446704816383  
O 20.35252327677203 4.698950941771802 3.46605605642948  
O 20.28132470344152 9.426254990726086 2.020344750268743  
O 16.3467792302363 8.756830971512768 10.85496424977953  
O 23.41303132593761 6.598272332723641 9.128709302578276  
O 13.86615796856777 12.45808297925897 8.575077919959321  
O 17.45326078068486 11.13099330780119 13.59340509529066  
O 14.58086463049772 5.63438256836113 11.62444388053558  
O 18.47034786048811 8.852107499572343 12.53067848295619  
O 13.7586778552472 8.241063748897087 11.40575760835124  
O 19.48050224678441 3.722606509400368 7.042248638495002  
H 23.07305519491893 5.361462577519608 11.36860991435836  
O 16.97243587802759 6.656548774097875 12.40999317864353  
O 19.33536900193661 4.83850849721988 10.4539627532421  
O 15.06536747596652 10.08171846122941 12.82919510309424  
O 18.51040110420783 7.405379980486505 10.32237629660046  
O 19.99329551239175 10.5426297938802 13.86971333952279  
O 14.51589216742796 10.49601776684166 10.20212837989296  
C 22.49889246752786 10.21836375358339 7.221103277394091  
H 16.81019830784976 6.261943082918061 8.658949094748833  
H 20.08346263466663 10.99717989668904 6.010893861032371  
H 15.29930328483697 3.770177651570263 5.621138710232731  
H 16.95147253947322 5.786264797132978 4.626436103465918

C 15.48121120586913 4.939082174881494 7.484887479229342  
H 20.60895332943867 10.26699386831652 4.45929536857203  
H 17.63620112072156 4.426252319213209 5.582291419095811  
H 18.3343605653719 7.262898223297828 4.354109166766355  
H 14.74787686206178 5.459946476590673 5.497942778614509  
H 15.68401109368768 7.114662408347154 7.560972324924549  
C 16.29098538446072 6.205563997063731 7.69601789552163  
C 21.84030800953769 8.852109463090736 7.101453266471456  
H 17.72068068102637 10.29490684597912 8.636639742760938  
H 17.25563735779403 8.660438859145545 3.346301235720345  
H 23.56264892396616 10.12527431654942 7.473984719245848  
H 14.46878491954571 5.037431968791372 7.898864058263842  
C 20.84229078573585 10.36475080377024 5.525502121353027  
H 15.97330845476467 4.085268860018074 7.969035519043825  
H 22.33319859867686 11.92238012243224 5.82349836497396  
H 22.96767627119076 10.42263953741287 5.098519703984295  
H 22.00346875223456 10.81888643502012 7.99799405383331  
C 22.25601863695498 10.82725321799374 5.832444158487859  
H 22.52946578614912 8.101133035170909 6.701469924799821  
H 21.40109304459322 8.487954726565267 8.03776128906868  
C 16.9051008982379 5.24604469021247 5.578596063728931  
Si 20.14813849983376 3.95907653282789 2.00159450400948  
Si 23.61803910669732 8.499798403550928 12.9059533807259  
H 18.66071082571554 2.676795332262826 11.54419803330269  
H 16.00600578825363 4.602022143088683 13.50919840799943  
H 19.96202528514853 1.684056099157537 8.537771271724608  
H 24.51731890527972 4.436668947214915 8.306794716560713  
H 25.13302028532887 5.271013293316582 4.519769553775865  
H 18.02281494344453 1.650738821807056 7.010795253176046  
Si 13.41161157448859 6.735130455453435 12.01198116602707  
H 12.05994605765219 11.12174859315991 9.806486412240682  
H 12.1595278663673 6.29533945259934 11.35170022378071  
Si 18.9027779477544 8.547381883468464 -1.391490884147836  
Si 20.35336841367202 6.224753548041149 -0.01019091238314268  
Si 17.17047174853669 11.96569406600497 0.690450180692907  
Si 15.12530476500975 13.54757639052923 2.307652399720728  
Si 14.33431729544196 14.67762936089485 4.995983672759918  
Si 13.65812962954835 13.9570828432801 7.934000485629821  
Si 24.35086004922854 8.421095862204451 2.94355766547118  
O 19.62183668801614 5.051695989834167 0.8750613002895602  
O 19.13792539293354 7.090907987995722 -0.6829722988163359  
O 16.31187882900322 12.47080845758523 1.976491564458011  
O 17.77508336021484 13.23260590899137 -0.1759757584107  
O 15.13083786630288 13.70154073312342 3.941891832777959  
O 17.28137478986026 8.791002418082316 -1.313104133395089  
O 20.95178076976182 11.65092510302189 0.7562926137946716  
O 16.20943072009608 11.09040210109364 -0.2985162656955105  
O 21.33231572506961 7.18114467946401 0.9120821220405936  
O 19.73273138326871 9.750230140694381 -0.6205517667369043

H 13.81880076984796 13.07586778650288 1.810249073131662  
O 14.3163528949505 13.89785383185922 6.43410963264518  
Si 21.47336788011123 10.15060875075224 14.49075184538873  
Si 15.82767610573598 11.32846620811171 13.61467750741988  
Si 14.31946855112148 13.62784957924152 12.23691062543555  
O 15.02693668682799 14.8719204593281 11.44255360400724  
H 22.31072865970459 11.37722455894331 14.41325579351224  
O 14.45384190287395 15.08864165847621 8.802734274600146  
H 18.17570107795384 9.1425874857346 15.0475543492068  
O 13.36728328415668 12.737755554762 11.22391759933169  
O 15.55578008577374 12.75363255427636 12.85854711359336  
Si 25.81289455869415 11.00987967644201 2.222681391322872  
O 24.681264876498 11.83150691157178 1.334961283278103  
O 25.10035156071605 9.86317695605219 3.17243561986419  
H 25.05575966614836 7.584066378264489 1.947228097568173  
H 24.49154953505514 9.697670737980129 12.78347819014082  
H 24.23070822229105 7.425423316205149 13.73483291262415  
H 21.29316800285494 9.666123509542404 15.88744672985955  
O 15.10074966927529 16.11745591834317 5.163726141828489  
H 21.44660607362712 3.375638317579622 1.562046290984502  
H 19.08010747336447 2.945880760392744 2.168231319982299  
H 13.28727673441662 6.834402758643248 13.49338654380222  
H 19.37561648446512 8.541868398479135 -2.789986361722159  
H 21.21414652622266 5.631181155048632 -1.053411224090878  
O 15.41883663754884 15.00798766713672 1.581166858714784  
H 12.94983312497287 14.91935375953842 4.524313794085709  
H 12.21820664150706 14.29673473323709 7.862354060380294  
Si 18.67168144054911 14.60623764783076 0.03180100296158797  
Si 16.23379940197917 10.03870576251072 -1.579814239941245  
Si 21.32583788300103 13.14874387616199 0.1976237123766612  
H 15.30878591044903 11.34286621922329 14.99613774181082  
H 13.44011129847711 14.12768226268753 13.31282856850667  
Si 14.58948637419795 15.88104241024539 10.22806493002782  
H 26.51077798038988 11.9516089047 3.138099079535125  
H 26.74131420510746 10.33708102121441 1.272614612895059  
Si 24.30197840506262 13.37697511266461 0.8688264254103431  
Si 15.78106563249047 17.34598434276356 4.314903783013697  
Si 16.57255165627347 16.19634464681085 1.603344259413794  
O 20.17079366512093 14.24316499107884 0.5842594204726773  
H 18.73323410750152 15.2734407263657 -1.283639496656469  
O 18.03610593330898 15.60208300759997 1.166372576252714  
H 16.65213229921861 10.78359111774888 -2.8008927757882  
H 14.87291211705372 9.463660526851024 -1.688773430264813  
O 22.67769277258538 13.63973759248276 0.9853351102305595  
H 21.53803255859364 13.0920039713374 -1.266741925199107  
H 13.31608781534752 16.56774342191118 10.54908446003496  
O 15.82537184905693 16.94714814574585 10.07556868313514  
H 24.96552820167034 14.34902794171596 1.777968677202915  
H 24.71869806979692 13.54195249291514 -0.551312468550209

O 16.75737836603589 16.7936440283267 3.114835072003264  
O 16.78198769085177 18.16549727452767 5.317480091523035  
H 14.71724932796508 18.22025355896489 3.768485158462326  
H 16.13010703379439 17.24567314308411 0.6634277844353932  
Si 16.07265967883708 18.47998078543554 9.524252542603971  
Si 16.67469752390994 19.24701771075589 6.55361585756662  
H 17.44827495688155 18.87046009662543 9.931591288514625  
O 15.94048390062914 18.56029882818721 7.872891156554532  
H 15.02909602068341 19.37103206882683 10.10388835282613  
H 18.06271642224856 19.64954501834693 6.902980705745343  
H 15.84043501480082 20.40054710341955 6.114802594363984

## 5.2. $Y(BH_4)_2(THF)_2/Y_{30}$

Y 18.83923283084387 7.976858857180677 6.469369656744343  
O 19.75967773942869 6.415885187437509 8.266906734076708  
O 17.1391787947831 6.296928634879324 6.791807752957689  
B 17.70242104669606 8.512592725878871 4.352517015689383  
B 18.18827113139691 9.750626094766394 8.042229345965181  
O 20.91540678720848 9.142994020200518 6.147713044186768  
H 19.26062129642802 9.225234323079455 8.376041198006604  
H 17.36142186998581 8.823534759533747 7.962712283964728  
H 16.95014118954954 8.576164541626689 5.340896424269426  
H 18.64634708228833 9.278653253966537 4.599948178380974  
H 18.32712814132988 10.16521197400399 6.880612552771235  
C 15.29760022083849 4.893489511190124 6.182505871893131  
Si 18.17039236111365 3.670904667623998 10.56821250977811  
Si 16.08298507918421 5.274972788485146 12.19765473006501  
Si 21.30777063098081 8.177328528424047 2.224290360708302  
Si 19.83034330648602 10.47435528811806 0.8539809458493575  
Si 18.494187349613 9.881468233758914 13.80418263901107  
Si 13.41633800444066 11.68575293321304 9.949332174471733  
Si 14.91892180604226 9.393209929388473 11.33423157194002  
Si 22.74906296161497 6.601091327088554 10.62701218066163  
Si 21.04101121424635 5.941662577004375 4.271742937360798  
Si 17.5811833336759 7.926885367331652 11.53693984404205  
Si 19.68358898635822 6.35703219482746 9.906124239924727  
Si 24.08493298078833 6.188396541070476 5.008869029902728  
Si 18.87698065889061 2.488932934351078 7.897700099083481  
Si 23.52133086268682 5.462304697900136 7.926597821978866  
Al 20.45763099817885 5.136961328554025 7.211988276870096  
O 24.06610134463929 6.345567634797317 6.631960393111449  
O 17.84675749404052 2.978307212000902 9.122954803702678  
O 24.35762374208173 7.701338708745439 4.418504293695334  
O 22.1860650074633 8.930044576413479 13.62557136456509  
O 21.10932302906223 6.797883815091907 10.57506261543071  
O 22.82148323496461 8.752144108301625 2.436365520584731  
O 22.09667004340634 4.751540449355946 7.649409590920392  
O 22.65137304444543 5.612677239232215 4.40672056598678  
O 23.36166965386298 7.92969405769215 11.37870748672181

O 16.73640572699355 4.306875614878519 11.05482595741542  
O 20.31907246290785 6.127077798707258 5.729627859893296  
O 20.79392961847691 7.379201655941252 3.537548074330036  
O 18.38275138456037 11.06337764071142 1.312871988247962  
O 20.34525720671695 4.703006547095742 3.465982338454141  
O 20.28505303250705 9.425981739292448 2.016169581065468  
O 16.34353356149003 8.7492243215525 10.85433689199946  
O 23.42248410815636 6.591343599452412 9.134814071031757  
O 13.86419239115135 12.45765968395669 8.575105140010262  
O 17.45344384532039 11.1306913315663 13.59660003622688  
O 14.583183705295 5.637009658742014 11.62133550197685  
O 18.47096765677869 8.852895946806436 12.52795718976218  
O 13.75720125381166 8.241496529495629 11.40750980578296  
O 19.45012349336243 3.744561341129685 7.04993204108088  
H 23.06693268544091 5.363672404271765 11.37491562112388  
O 16.97783440331714 6.653426371350517 12.41042885515424  
O 19.33801550933318 4.834617576626775 10.43422993158273  
O 15.06907958058313 10.07925263286904 12.82937732714218  
O 18.50589358035068 7.401015198724153 10.31754121227838  
O 19.99365162906204 10.5410364116856 13.86873003103043  
O 14.51518996426129 10.49467469067998 10.20248004328269  
C 22.40138139348504 10.9555170710326 5.815177713394331  
H 16.66059347288432 6.45514402438824 8.806848033203631  
H 22.66004705103054 8.253286038550629 6.861152108958366  
H 15.09730240468289 3.855798731391488 5.884966218729236  
H 16.71531233987087 5.861002968152876 4.791998811761376  
C 15.31992193300938 5.082892221332894 7.706842655912689  
H 21.49815573126232 8.753511986420957 8.132077981722858  
H 17.42607342830049 4.518627876898433 5.756023578086212  
H 18.18142985861489 7.36999564783138 4.334258858427809  
H 14.53289418625173 5.537822218712946 5.724116281831345  
H 15.51451596516827 7.264909998583185 7.696720408047147  
C 16.12532690092574 6.361756375216568 7.855756719763217  
C 20.98809106180645 10.48051790478843 5.528422197544725  
H 17.8348967621287 10.60724614180484 8.80543935209919  
H 17.1466299106693 8.790674656849003 3.324207280791751  
H 22.48065675122509 12.04931637609004 5.759327368763688  
H 14.31795986558975 5.181763365634651 8.145006836249255  
C 21.96978956826901 9.041088154000416 7.182467158393153  
H 15.83568931431608 4.248273247876952 8.201249606296217  
H 23.70534445285884 10.31985909436376 7.48538330717662  
H 22.15465816139446 11.05182099432592 7.979007141283994  
H 23.11193405671578 10.51744748466139 5.098999125560048  
C 22.64123397761256 10.40872084453005 7.230990938398266  
H 20.22826387065769 11.12274187551437 6.002228286825192  
H 20.74934910354016 10.35330746718233 4.465408776482756  
C 16.69428302192879 5.338630231974641 5.756373669285756  
Si 20.14813849983376 3.95907653282789 2.00159450400948  
Si 23.61803910669732 8.499798403550928 12.9059533807259

H 18.66572166403169 2.689299345098874 11.5541536245271  
H 16.00405014137731 4.599400748656825 13.50756657525143  
H 19.98213930491771 1.704244619941643 8.527599057225865  
H 24.54171410960194 4.448749515958386 8.273054047415329  
H 25.13721142364065 5.253794569011887 4.563634551263549  
H 18.03453703131802 1.639960549206495 7.011120670163232  
Si 13.41161157448859 6.735130455453435 12.01198116602707  
H 12.06017655658223 11.1205772290958 9.808094818647454  
H 12.16075788185531 6.29333496158816 11.35060599542048  
Si 18.9027779477544 8.547381883468464 -1.391490884147836  
Si 20.35336841367202 6.224753548041149 -0.01019091238314268  
Si 17.17047174853669 11.96569406600497 0.690450180692907  
Si 15.12530476500975 13.54757639052923 2.307652399720728  
Si 14.33431729544196 14.67762936089485 4.995983672759918  
Si 13.65812962954835 13.9570828432801 7.934000485629821  
Si 24.35086004922854 8.421095862204451 2.94355766547118  
O 19.62466091347015 5.045458322209508 0.8684231423257187  
O 19.13705883494394 7.09435913458234 -0.6749974191012018  
O 16.31105453153887 12.47119156096558 1.975392600937345  
O 17.77286102176479 13.23426176903445 -0.1765711362619531  
O 15.13142712392497 13.70296521731215 3.94175198014728  
O 17.28139735065642 8.789804330534764 -1.319351388473828  
O 20.95457618511529 11.64935379201031 0.7535828386124996  
O 16.2109346403589 11.08869892564533 -0.2979848195259899  
O 21.33617674499919 7.173695875647979 0.9185737779961596  
O 19.73077462248606 9.752179454676183 -0.6220575875345105  
H 13.81800102607625 13.07712262579973 1.811077995815132  
O 14.31580866474104 13.89833884520484 6.434398377612641  
Si 21.47336788011123 10.15060875075224 14.49075184538873  
Si 15.82767610573598 11.32846620811171 13.61467750741988  
Si 14.31946855112148 13.62784957924152 12.23691062543555  
O 15.02606435555367 14.8727472287544 11.44391581194346  
H 22.31095736029125 11.37679845195065 14.41064957452766  
O 14.45438828085322 15.08744163806358 8.803805593573776  
H 18.17657107902608 9.138510347221796 15.04530125886926  
O 13.36763397252955 12.73664762379069 11.22480246434864  
O 15.55594295021239 12.7527177116557 12.8580062937111  
Si 25.81289455869415 11.00987967644201 2.222681391322872  
O 24.68202328533863 11.83125686153092 1.334083482017169  
O 25.09858490813363 9.864688610381833 3.173044920017849  
H 25.04755030855591 7.593542229058946 1.933378866198696  
H 24.4911692382721 9.697766219600556 12.78295637323163  
H 24.23265080725757 7.423340851898127 13.73057009539595  
H 21.292820170622 9.66855712753121 15.88820907135698  
O 15.09911558571741 16.11861400643686 5.164001700856787  
H 21.45044016617261 3.377643576185175 1.570460085595349  
H 19.08260246737008 2.943116368413995 2.166486100586142  
H 13.28779242090095 6.830202777232369 13.49360847836329  
H 19.38012665942238 8.535613539228114 -2.788490315134611

H 21.21376725279734 5.638669982441038 -1.058010828905361  
O 15.41903168508615 15.00819523042199 1.580761361901379  
H 12.94954314726967 14.91868792393163 4.524594471005209  
H 12.21833145721307 14.29772518017612 7.863309408926719  
Si 18.67168144054911 14.60623764783076 0.03180100296158797  
Si 16.23379940197917 10.03870576251072 -1.579814239941245  
Si 21.32583788300103 13.14874387616199 0.1976237123766612  
H 15.30700172270715 11.34217737914757 14.9954849977062  
H 13.44041155997624 14.12597002498762 13.3138964302063  
Si 14.58948637419795 15.88104241024539 10.22806493002782  
H 26.51082412256319 11.95174041127228 3.13806951473552  
H 26.74172915695288 10.33576498787966 1.273955644508154  
Si 24.30197840506262 13.37697511266461 0.8688264254103431  
Si 15.78106563249047 17.34598434276356 4.314903783013697  
Si 16.57255165627347 16.19634464681085 1.603344259413794  
O 20.1700124666484 14.24155613286419 0.5861370888537355  
H 18.73633070547432 15.2729432360909 -1.283818600477806  
O 18.03656673862798 15.60415471536465 1.164966129373656  
H 16.64990780037848 10.7854201399263 -2.800669489958096  
H 14.87289485457716 9.463495240895 -1.688136230438319  
O 22.67800580184515 13.63987847140036 0.9857557028468568  
H 21.53871523057505 13.09530737245543 -1.266841643762174  
H 13.31587425719141 16.56768107784331 10.54854953317961  
O 15.82513800518364 16.94734664422675 10.07603236990518  
H 24.96607135334203 14.34809647420254 1.778676468219069  
H 24.71925181520201 13.54263610025547 -0.5510953716842451  
O 16.75755801319457 16.7931045737156 3.115289175291114  
O 16.78207140208309 18.16554382706851 5.317708626400747  
H 14.71826076747731 18.22124966773302 3.767980451550079  
H 16.12947896821899 17.24651848380914 0.664549322168832  
Si 16.07265967883708 18.47998078543554 9.524252542603971  
Si 16.67469752390994 19.24701771075589 6.55361585756662  
H 17.44843611192728 18.8701152231422 9.931431121151624  
O 15.94005321224202 18.56082223710788 7.873072451986793  
H 15.02948210374646 19.37124500526972 10.1043480373263  
H 18.06265533760351 19.64946492864961 6.903431064396025  
H 15.84075461987532 20.40082745679901 6.11483552427825

### 5.3. $\text{La}(\text{BH}_4)_2(\text{THF})_2/\text{Y}_{30}$

La 18.93514934854764 8.190783666774111 6.558395701026415  
O 19.81170713998769 6.410454990873427 8.274343630037755  
O 16.90812850789806 6.725170514919354 7.146328150254925  
B 17.5892591926862 8.752998598325775 4.386839035971406  
B 18.49961261197378 10.20638870886163 8.179732052691103  
O 21.18078005786165 9.329701658492139 6.11339458989008  
H 19.49396397510832 9.541965311440649 8.521283307239894  
H 17.55089382653902 9.406469056708151 8.134735066360939  
H 16.95301863919926 8.981760409509191 5.432493816493556  
H 18.63709904535661 9.416052257704983 4.482977109620762

H 18.68605915627153 10.56049155624798 7.002206205577704  
C 15.4509907523822 4.870952237499367 7.125791673140343  
Si 18.17039236111365 3.670904667623998 10.56821250977811  
Si 16.08298507918421 5.274972788485146 12.19765473006501  
Si 21.30777063098081 8.177328528424047 2.224290360708302  
Si 19.83034330648602 10.47435528811806 0.8539809458493575  
Si 18.494187349613 9.881468233758914 13.80418263901107  
Si 13.41633800444066 11.68575293321304 9.949332174471733  
Si 14.91892180604226 9.393209929388473 11.33423157194002  
Si 22.74906296161497 6.601091327088554 10.62701218066163  
Si 21.04101121424635 5.941662577004375 4.271742937360798  
Si 17.5811833336759 7.926885367331652 11.53693984404205  
Si 19.68358898635822 6.35703219482746 9.906124239924727  
Si 24.08493298078833 6.188396541070476 5.008869029902728  
Si 18.87698065889061 2.488932934351078 7.897700099083481  
Si 23.52133086268682 5.462304697900136 7.926597821978866  
Al 20.48324064513776 5.12242079158641 7.213974639720483  
O 24.03519072162716 6.359107726612914 6.62924962700667  
O 17.84978489057641 2.957366054039828 9.132832197365756  
O 24.38582160807444 7.694462526201597 4.413496057491424  
O 22.18490081696039 8.932522773390348 13.6211153581221  
O 21.10444126261901 6.787233689328509 10.60206103502114  
O 22.81631901631249 8.750518724577303 2.45485632387302  
O 22.11658305702489 4.708884738957553 7.648654352034391  
O 22.65840277322877 5.628497277963765 4.375322226678948  
O 23.36725502579912 7.9280228588496 11.37757409683377  
O 16.73448873281121 4.308016949282217 11.05362902790031  
O 20.34889405370526 6.119432084053446 5.738100970623107  
O 20.76664093635274 7.381835779021446 3.53773735477341  
O 18.38281350183196 11.0627988165306 1.311078342131087  
O 20.34610638861727 4.701038705135645 3.467607873785926  
O 20.2884708943779 9.426653914530705 2.013210500512652  
O 16.34852120548258 8.759162927830459 10.85078782060668  
O 23.39122538702037 6.601891081992405 9.121891118366301  
O 13.88237724911689 12.46441832007031 8.585491053538874  
O 17.45258070003171 11.12825139218098 13.58609042372196  
O 14.57941000593659 5.631558471126514 11.62782045301285  
O 18.47239098331074 8.846502724721953 12.53149124782411  
O 13.76458032039953 8.235695666309518 11.4002289873757  
O 19.42352600173788 3.767586472141509 7.060641779328473  
H 23.08735426742632 5.36148868817734 11.36245814919695  
O 16.97290043794926 6.657173585001497 12.40712959042281  
O 19.3320911723978 4.836113308363773 10.42747957964011  
O 15.06433357978838 10.08277612162166 12.82584287146118  
O 18.50096484390993 7.407536456819378 10.30211632395049  
O 19.99262509350376 10.54110049015352 13.87114591979486  
O 14.50794212532624 10.48423334148851 10.19439861106594  
C 22.63382376131322 10.80696734922939 7.288700366745468  
H 15.88221076168003 7.853245754241284 8.541046343125696

H 20.36253606691277 11.19631935934934 5.62380022249029  
H 15.90555624676409 4.136211079942772 7.802577790183753  
H 16.15826757050429 5.962297927378777 5.349512238123617  
C 14.7774458627921 6.011012171257676 7.93974153753717  
H 21.22564550410896 10.35780743540137 4.294593772767406  
H 17.44067503184633 4.98374684073601 6.154344979046091  
H 17.93251769069865 7.557271858636131 4.430008008288016  
H 14.74418005188623 4.345384356165822 6.470451483020376  
H 15.20011687667709 7.89924096346021 6.88279796440859  
C 15.64063545144301 7.250829546129769 7.658374097313027  
C 22.193794356377 9.355280471077689 7.189823868843236  
H 18.28904702523131 11.13211266729784 8.920089807307084  
H 16.96266719787286 9.016086870012563 3.393090562291664  
H 23.64532260748798 10.89766453044943 7.705315388803063  
H 13.73935582198234 6.186496205544777 7.627180512061374  
C 21.25115159447875 10.6022767358327 5.362734534047261  
H 14.77188992955897 5.766785050822314 9.009461729230836  
H 22.48633085928288 12.36082758264645 5.72132584129049  
H 23.39645871905929 10.90200546301308 5.244172946899942  
H 21.93648560295093 11.37529482066991 7.921803387947744  
C 22.53778424886456 11.26921611672278 5.826009018780497  
H 23.0136522230669 8.687239697513149 6.892022236855716  
H 21.72601896118558 8.9701590493893 8.107197297347547  
C 16.53367594105712 5.580760569476825 6.314394528676493  
Si 20.14813849983376 3.95907653282789 2.00159450400948  
Si 23.61803910669732 8.499798403550928 12.9059533807259  
H 18.66771806203532 2.700514904891861 11.56445835108615  
H 16.00935793181862 4.603680636270417 13.50995974024425  
H 20.00246170332366 1.721419046250843 8.512098218209884  
H 24.56778052483761 4.478499544571364 8.280286039707226  
H 25.13618078873494 5.240134039861739 4.590459588513221  
H 18.04434362204724 1.634059564881942 7.009400352792602  
Si 13.41161157448859 6.735130455453435 12.01198116602707  
H 12.05808853297159 11.12910529161782 9.794907388070248  
H 12.16080544181283 6.295222892116741 11.3499711713941  
Si 18.9027779477544 8.547381883468464 -1.391490884147836  
Si 20.35336841367202 6.224753548041149 -0.01019091238314268  
Si 17.17047174853669 11.96569406600497 0.690450180692907  
Si 15.12530476500975 13.54757639052923 2.307652399720728  
Si 14.33431729544196 14.67762936089485 4.995983672759918  
Si 13.65812962954835 13.9570828432801 7.934000485629821  
Si 24.35086004922854 8.421095862204451 2.94355766547118  
O 19.62473915250766 5.047208303040157 0.8697364534316142  
O 19.13778584225981 7.095134558060272 -0.6738896840416602  
O 16.31209569059057 12.47306733685278 1.974931098867298  
O 17.77417250681738 13.23396313906693 -0.1769073507194578  
O 15.12990691522777 13.70225278639336 3.941814480009358  
O 17.28171246563893 8.790126505664134 -1.318508563184961  
O 20.95468153984269 11.64975575545135 0.7539858358792473

O 16.21063289532816 11.0904534349193 -0.2994564731958314  
O 21.33999671401677 7.172192400638997 0.920104518050186  
O 19.73194654760206 9.751980719071714 -0.6225948318796219  
H 13.8185000627614 13.0768767458085 1.809991740474818  
O 14.316002597499 13.8976009892703 6.434731461647012  
Si 21.47336788011123 10.15060875075224 14.49075184538873  
Si 15.82767610573598 11.32846620811171 13.61467750741988  
Si 14.31946855112148 13.62784957924152 12.23691062543555  
O 15.03488095622087 14.85554839335945 11.42608484525358  
H 22.31003808323858 11.37746033595012 14.41246559278879  
O 14.43505201358919 15.10625927112855 8.795688424942568  
H 18.17200667406857 9.142887498626951 15.04667601580915  
O 13.36762741569138 12.72190545019925 11.23649633911318  
O 15.55141755069763 12.75810544046707 12.87306824781078  
Si 25.81289455869415 11.00987967644201 2.222681391322872  
O 24.68621208963022 11.83009602948492 1.327527719820549  
O 25.09223609543886 9.869027741576422 3.173280817289851  
H 25.03870546385048 7.605837477828147 1.917566481676741  
H 24.49300626273781 9.696546769338415 12.78368637602334  
H 24.22954775936401 7.423351784995146 13.73288187482876  
H 21.29458720985766 9.665154192152958 15.88724634002013  
O 15.09971446311848 16.11817117675233 5.163857924848837  
H 21.45143947084413 3.380517477302432 1.569250093278785  
H 19.08407945487751 2.941631297472659 2.164077552628459  
H 13.28739177373132 6.838004999490927 13.49285186645087  
H 19.3797905609615 8.534389589048109 -2.788634911606179  
H 21.21394591707996 5.639312557693665 -1.058207274749876  
O 15.41815450400878 15.00921788486486 1.581954008980494  
H 12.94912632708695 14.91939386760128 4.526152512152148  
H 12.21334755006495 14.27591809796225 7.860845745497918  
Si 18.67168144054911 14.60623764783076 0.03180100296158797  
Si 16.23379940197917 10.03870576251072 -1.579814239941245  
Si 21.32583788300103 13.14874387616199 0.1976237123766612  
H 15.31321961290497 11.33052080681999 14.99780723024695  
H 13.43882111896763 14.14390920225448 13.30385067381099  
Si 14.58948637419795 15.88104241024539 10.22806493002782  
H 26.50776601222689 11.95366510947472 3.138621012265607  
H 26.74479516696974 10.33263969231348 1.279371904303411  
Si 24.30197840506262 13.37697511266461 0.8688264254103431  
Si 15.78106563249047 17.34598434276356 4.314903783013697  
Si 16.57255165627347 16.19634464681085 1.603344259413794  
O 20.17113398115918 14.2428914038413 0.5848400680360741  
H 18.73590582163307 15.27397513342313 -1.2833922902223  
O 18.03656185159202 15.60329209614882 1.165798142955633  
H 16.65006535446517 10.78394543415569 -2.801618195555826  
H 14.87310970934365 9.463043149277242 -1.688058351411453  
O 22.67800916775785 13.63767090263765 0.9882640841538739  
H 21.54132426171384 13.09550105510996 -1.266478462652286  
H 13.32078359089479 16.5662240394955 10.57053059907129

O 15.82515560269461 16.94699596247832 10.07622431213213  
H 24.96595994174323 14.34518473669665 1.781971891417885  
H 24.71802071734302 13.54819357018905 -0.5507699252273005  
O 16.75765672399276 16.79444697958882 3.114832522378582  
O 16.78195152921153 18.16563222511349 5.317791356899567  
H 14.71780554615436 18.22106200462177 3.768542567063122  
H 16.13055754327912 17.2460507010114 0.6634577111207055  
Si 16.07265967883708 18.47998078543554 9.524252542603971  
Si 16.67469752390994 19.24701771075589 6.55361585756662  
H 17.44839440735904 18.86997460849815 9.93159959456456  
O 15.93991016393142 18.5611875371355 7.873257561921541  
H 15.02929586799615 19.37077386417727 10.1047073164893  
H 18.06270464289837 19.64937448353741 6.903396576271329  
H 15.84096546754787 20.40098736830268 6.114814274996354

## 6. Supplementary References

- <sup>1</sup> Y. Li, U. Kanbur, J. Cui, G. Wang, T. Kobayashi, A. D. Sadow, and L. Qi, *Angew. Chem. Int. Ed.* 2022, **61**, e202117394.
- <sup>2</sup> S. A. Southern, Y. Li, D.-J. Liu, A. D. Sadow, L. Qi, and F. A. Perras, *ACS Catal.* 2024, **14**, 9440.
- <sup>3</sup> Y. Li, T. Kobayashi, D. M. Meira, L. An, L. Qi, and A. D. Sadow, *J. Am. Chem. Soc.* 2025, **147**, 12574.
- <sup>4</sup> J. P. Perdew, K. Burke, and M. Ernzerhof, *Phys. Rev. Lett.* 1996, **77**, 3865.
- <sup>5</sup> S. Grimme, J. Antony, S. Ehrlich, and H. A. Krieg, *J. Chem. Phys.* 2010, **132**, 154104.
- <sup>6</sup> G. te Velde, F. M. Bickelhaupt, E. J. Baerends, C. Fonseca Guerra, S. J. A. van Gisbergen, J. G. Snijders, and T. Ziegler, *J. Comput. Chem.* 2001, **22**, 931.
- <sup>7</sup> G. Henkelman and B. P. Uberuaga, and H. Jónsson, *J. Chem. Phys.* 2000, **113**, 9901.
- <sup>8</sup> G. Henkelman and H. Jónsson, *J. Chem. Phys.* 2000, **113**, 9978.
- <sup>9</sup> P. Giannozzi, S. Baroni, N. Bonini, M. Calandra, R. Car, C. Cavazzoni, D. Ceresoli, G. L. Chiarotti, M. Cococcioni, I. Dabo, *et al.*, *J. Phys. Condens. Matter*, 2009, **21**, 395502.
- <sup>10</sup> P. Giannozzi, O. Andreussi, T. Brumme, O. Bunau, M. B. Nardelli, M. Calandra, R. Car, C. Cavazzoni, D. Ceresoli, M. Cococcioni, *et al.*, *J. Phys. Condens. Matter*, 2017, **29**, 465901.
- <sup>11</sup> P. Gianluca, M. Antimo, C. E. Ivano, M. Nicolas, P. Elsa, and M. Nichola, A Standard Solid State Pseudopotential (SSSP) Library Optimized for Precision and Efficiency, <https://www.materialscloud.org/discover/sssp/table/efficiency>.
- <sup>12</sup> [https://github.com/fperras/Dynamic\\_Quad\\_lineshape](https://github.com/fperras/Dynamic_Quad_lineshape)
- <sup>13</sup> S. Adiga, D. Aebi, and D. L. Bryce, *Can. J. Chem.* 2007, **85**, 496.
- <sup>14</sup> M. Bak, N. C. Nielsen, *J. Magn. Reson.* 1997, **125**, 132.
